# Supplementary material for: Wet versus dry adhesion of biomimetic mushroom-shaped microstructures
Source: Royal Society of Chemistry journal article supplement (doi:10.1039/c2sm25431j), 2012-01-01
Supplement: c2sm25431j.pdf [file c2sm25431j.pdf]

Supplementary material for

**Wet versus dry adhesion of biomimetic mushroom-shaped microstructure**

A.E. Kovalev<sup>1</sup>, M. Varenberg<sup>2</sup>, S.N. Gorb<sup>1</sup>

<sup>1</sup> Functional Morphology and Biomechanics, Zoological Institute, Christian-Albrecht-University of Kiel, Kiel, Germany

<sup>2</sup> Department of Mechanical Engineering, Technion - Israel Institute of Technology, Haifa 32000, Israel

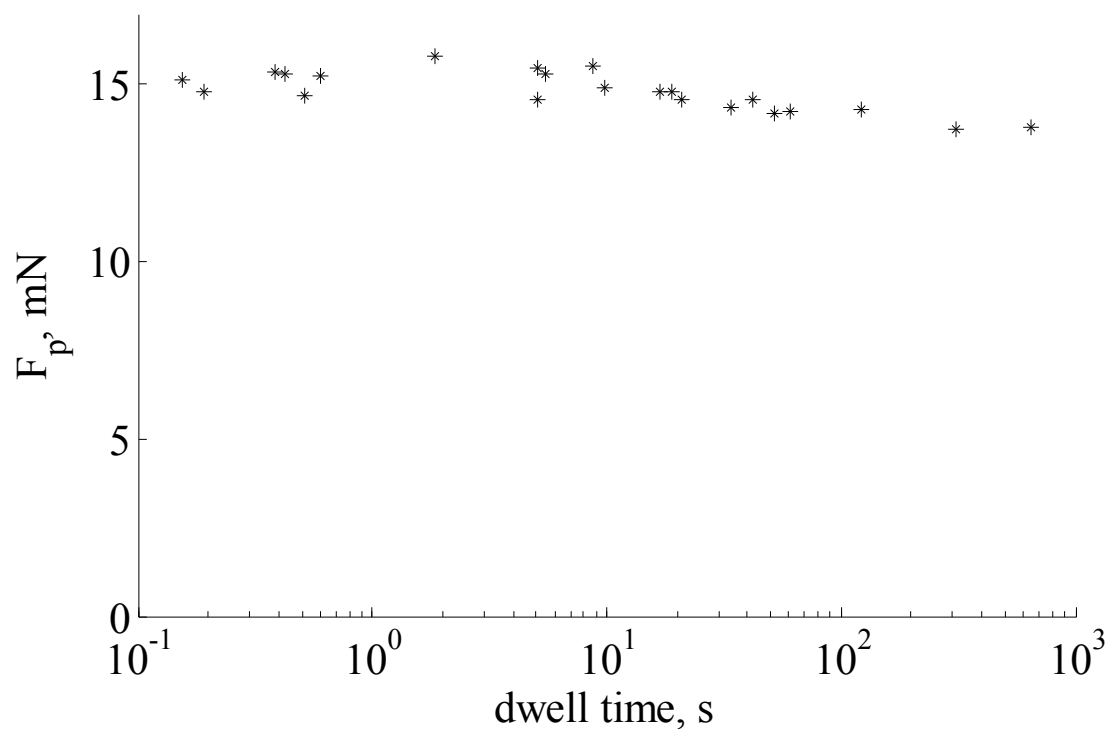

Figure S1. Dependence of pull-off force on the dwell time between loading and unloading for smooth sample on smooth substrate in presence of oil.
